# Supplementary material
Source: ML conference proceedings conference paper supplement (https://aclanthology.org/2024.semeval-1.92)
Supplement: SupplementaryMaterial [file 2024.semeval-1.92.SupplementaryMaterial.zip]

Stage 1: Abductive Reasoning from the Teacher Model

Given the textual of a meme: 'I HATE TRUMP. \n\n MOST TERRORIST DO.', which is embedded in its image: 'A woman hates a man but he rebuts it.',. Please provide a streamlined rationale for inferring the meme as 'propagandistic'.

Prompt

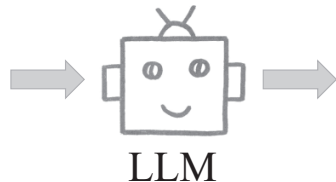

**Rationale**

The meme combines emotionally charged language expressing intense hatred towards Trump with an image showing a woman hating a man who rebuts it. This juxtaposition creates a conflict in the narrative, introducing a contradictory element. By doing so, the meme may attempt to generate confusion, potentially manipulating perceptions through the strategic use of conflicting visual and textual elements. This aligns with techniques often associated with propaganda.

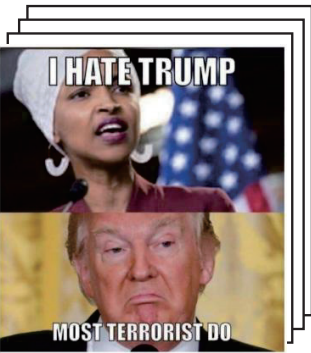

Meme

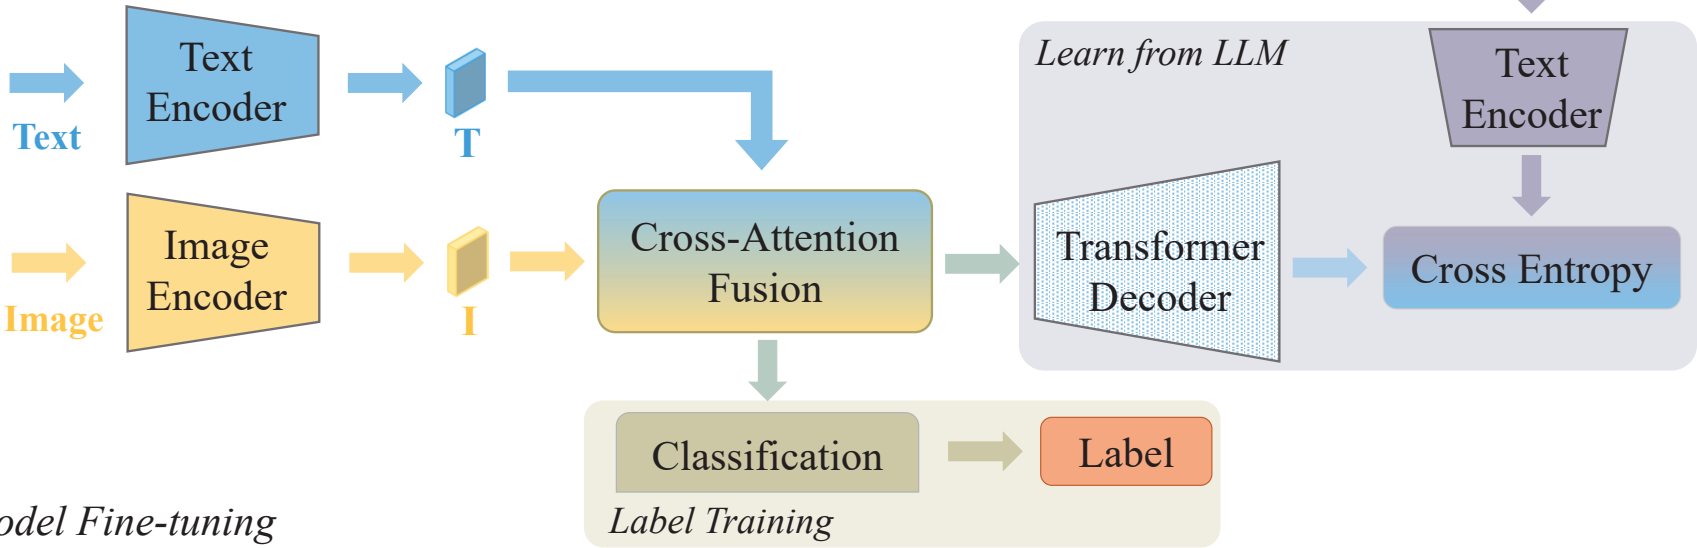

Stage 2: Student Model Fine-tuning
